# Supplementary material
Source: bioRxiv or medRxiv preprint supplement (https://www.biorxiv.org/highwire/filestream/26902/field_highwire_adjunct_files/9/095349-7.pdf)
Supplement: Supplementary file [file 095349-7.pdf]

| Top promoter[SNPs in top promoter]                             | Linkage                                                                                                                                                                                                 | Corrected coexpression score | FDR  |
|----------------------------------------------------------------|---------------------------------------------------------------------------------------------------------------------------------------------------------------------------------------------------------|------------------------------|------|
| p@chr9:107669326..107669336,+ [rs4100654, rs13284054]          |                                                                                                                                                                                                         | 0.71                         | 0.0  |
| p2@ENST00000518619 [rs9987289, rs4841132]                      |                                                                                                                                                                                                         | 0.67                         | 0.0  |
|                                                                | rs9987289:rs7357361 D'=1.0; r <sup>2</sup> =0.57.<br>enhancer@chr8:9219931-9220273<br>[rs7357361];rs4841132:rs7357361 D'=1.0; r <sup>2</sup> =0.57.<br>enhancer@chr8:9219931-9220273 [rs7357361]        | 0.1                          | 0.76 |
| chr11:47281010..47281020,+ [rs11039155]                        |                                                                                                                                                                                                         | 0.64                         | 0.0  |
| p13@BC172787 [rs693]                                           |                                                                                                                                                                                                         | 0.64                         | 0.0  |
| p1@SLC17A3 [rs13198474]                                        |                                                                                                                                                                                                         | 0.6                          | 0.0  |
| p@chr18:47176875..47176889,+ [rs4939886, rs4939887, rs4939888] |                                                                                                                                                                                                         | 0.55                         | 0.0  |
| p@chr19:45411878..45411884,- [rs7412]                          |                                                                                                                                                                                                         | 0.52                         | 0.0  |
| p2@F2 [rs2070852, rs5896]                                      |                                                                                                                                                                                                         | 0.51                         | 0.0  |
|                                                                | rs2070852:rs4752927 D'=1.0; r <sup>2</sup> =0.29.<br>p@chr11:46702222..46702264,-<br>[rs4752927];rs5896:rs4752927 D'=1.0; r <sup>2</sup> =0.84.<br>p@chr11:46702222..46702264,- [rs4752927]             | 0.26                         | 0.38 |
| p1@APOA5 [rs651821]                                            |                                                                                                                                                                                                         | 0.5                          | 0.0  |
|                                                                | rs651821:rs11216164 D'=1.0; r <sup>2</sup> =0.06.<br>p@chr11:116734451..116734464,- [rs11216164]                                                                                                        | 0.09                         | 0.79 |
| p8@ALDH1A2 [rs1122208]                                         |                                                                                                                                                                                                         | 0.48                         | 0.01 |
| chr8:19824080..19824096,+ [rs1059507, rs3735964]               |                                                                                                                                                                                                         | 0.48                         | 0.01 |
|                                                                | rs3735964:rs1569209 D'=1.0; r <sup>2</sup> =0.87.<br>p@chr8:19830089..19830095,+ [rs1569209]                                                                                                            | 0.29                         | 0.29 |
| enhancer@chr7:73037168-73037552 [rs55747707]                   |                                                                                                                                                                                                         | 0.48                         | 0.01 |
| p2@ENST00000519197 [rs28597716]                                |                                                                                                                                                                                                         | 0.48                         | 0.01 |
| p@chr2:165603312..165603317,- [rs10178921]                     |                                                                                                                                                                                                         | 0.45                         | 0.02 |
|                                                                | rs10178921:rs355894 D'=1.0; r <sup>2</sup> =0.22.<br>enhancer@chr2:165635333-165635585 [rs355894]<br>rs10178921:rs355863 D'=1.0; r <sup>2</sup> =1.0. p10@COBLL1<br>[rs355863]                          | 0.11                         | 0.76 |
| p@chr8:116588829..116588841,+ [rs2049867]                      |                                                                                                                                                                                                         | 0.44                         | 0.02 |
| p8@MMP9 [rs2236416]                                            |                                                                                                                                                                                                         | 0.43                         | 0.03 |
| p@chr19:11334017..11334033,- [rs4804154, rs4804155]            |                                                                                                                                                                                                         | 0.43                         | 0.03 |
|                                                                | rs4804154:rs737337 D'=0.92; r <sup>2</sup> =0.66.<br>p@chr19:11347228..11347241,-<br>[rs737337];rs4804155:rs737337 D'=0.92; r <sup>2</sup> =0.66.<br>p@chr19:11347228..11347241,- [rs737337]            | 0.35                         | 0.17 |
| p@chr19:52327915..52327926,+ [rs3752125]                       |                                                                                                                                                                                                         | 0.4                          | 0.08 |
| chr11:122526685..122526694,+ [rs7127978]                       |                                                                                                                                                                                                         | 0.39                         | 0.09 |
| p@chr7:17287199..17287204,+ [rs6968554]                        |                                                                                                                                                                                                         | 0.38                         | 0.1  |
| p@chr15:58576429..58576468,- [rs1711037]                       |                                                                                                                                                                                                         | 0.38                         | 0.1  |
| p@chr12:20473724..20473755,+ [rs7134375]                       |                                                                                                                                                                                                         | 0.38                         | 0.1  |
| p@chr4:88057279..88057283,+ [rs1408]                           |                                                                                                                                                                                                         | 0.37                         | 0.14 |
| p5@INHBE [rs3809114]                                           |                                                                                                                                                                                                         | 0.36                         | 0.14 |
| p3@LIPC [rs2070895]                                            |                                                                                                                                                                                                         | 0.36                         | 0.15 |
| chr11:48066327..48066358,+ [rs7934659]                         |                                                                                                                                                                                                         | 0.35                         | 0.17 |
| enhancer@chr15:58884938-58885321 [rs11637365]                  |                                                                                                                                                                                                         | 0.34                         | 0.18 |
| p@chr19:8468345..8468362,+ [rs2230876]                         |                                                                                                                                                                                                         | 0.33                         | 0.2  |
| p@chr2:211540478..211540490,+ [rs1047891]                      |                                                                                                                                                                                                         | 0.33                         | 0.2  |
| p@chr16:68114139..68114174,+ [rs7188085]                       |                                                                                                                                                                                                         | 0.32                         | 0.23 |
| p@chr6:32412666..32412686,+ [rs7194]                           |                                                                                                                                                                                                         | 0.32                         | 0.23 |
| p@chr12:124433988..124434017,- [rs2178663]                     |                                                                                                                                                                                                         | 0.32                         | 0.23 |
|                                                                | rs2178663:rs9863 D'=1.0; r <sup>2</sup> =0.92.<br>p@chr12:124421545..124421559,- [rs9863]                                                                                                               | 0.1                          | 0.76 |
| p7@ZDHHHC18 [rs12760759]                                       |                                                                                                                                                                                                         | 0.3                          | 0.28 |
|                                                                | rs12760759:rs17162313 D'=1.0; r <sup>2</sup> =1.0.<br>enhancer@chr1:27175784-27176273 [rs17162313]<br>rs12760759:rs1883660 D'=1.0; r <sup>2</sup> =0.59.<br>enhancer@chr1:27191386-27191927 [rs1883660] | 0.19                         | 0.57 |
| p@chr11:126226533..126226546,- [rs73632737]                    |                                                                                                                                                                                                         | 0.06                         | 0.84 |
| chr15:63346713..63346752,+ [rs4468558]                         |                                                                                                                                                                                                         | 0.3                          | 0.28 |
|                                                                | rs4468558:rs7174174 D'=0.94; r <sup>2</sup> =0.83.<br>chr15:63372403..63372411,- [rs7174174]                                                                                                            | 0.29                         | 0.29 |
| p14@FADS1 [rs174548, rs174549, rs174550]                       |                                                                                                                                                                                                         | 0.19                         | 0.57 |
| p@chr16:56742451..56742454,- [rs4238789]                       |                                                                                                                                                                                                         | 0.29                         | 0.29 |
| p4@NISCH [rs4687618]                                           |                                                                                                                                                                                                         | 0.27                         | 0.36 |
|                                                                | rs4687618:rs887515 D'=1.0; r <sup>2</sup> =0.25. p33@NISCH<br>[rs887515]                                                                                                                                | 0.1                          | 0.76 |
| p3@TGOLN2 [rs10460587]                                         |                                                                                                                                                                                                         | 0.26                         | 0.4  |
| enhancer@chr6:30796195-30796565 [rs1264350]                    |                                                                                                                                                                                                         | 0.25                         | 0.4  |
| p@chr19:54775040..54775082,- [rs419304]                        |                                                                                                                                                                                                         | 0.25                         | 0.4  |
| p@chr17:76377571..76377602,- [rs4082919]                       |                                                                                                                                                                                                         | 0.25                         | 0.42 |
| p@chr16:68299481..68299485,- [rs12596500]                      |                                                                                                                                                                                                         | 0.24                         | 0.42 |
|                                                                | rs12596500:rs12447119 D'=1.0; r <sup>2</sup> =0.87. p5@SLC7A6<br>[rs12447119]<br>rs12596500:rs7184821 D'=1.0; r <sup>2</sup> =0.5. p2@ESRP2<br>[rs7184821]                                              | 0.18                         | 0.57 |
| p@chr16:67581701..67581719,- [rs13334205]                      |                                                                                                                                                                                                         | 0.24                         | 0.42 |
| chr10:5799591..5799598,+ [rs2275774]                           |                                                                                                                                                                                                         | 0.24                         | 0.42 |
| p@chr19:45242420..45242462,+ [rs1531517]                       |                                                                                                                                                                                                         | 0.24                         | 0.42 |
| p@chr4:103212519..103212530,- [rs233807]                       |                                                                                                                                                                                                         | 0.24                         | 0.43 |
| enhancer@chr1:230289705-230290142 [rs7551742]                  |                                                                                                                                                                                                         | 0.23                         | 0.46 |
|                                                                | rs7551742:rs4846905 D'=0.93; r <sup>2</sup> =0.83.<br>enhancer@chr1:230279464-230279771 [rs4846905]                                                                                                     | 0.18                         | 0.57 |
| p@chr17:37970009..37970013,- [rs9909593]                       |                                                                                                                                                                                                         | 0.22                         | 0.46 |
| p@chr4:157683775..157683778,- [rs1425486]                      |                                                                                                                                                                                                         | 0.2                          | 0.55 |
| p@chr11:45880009..45880015,+ [rs1401417]                       |                                                                                                                                                                                                         | 0.2                          | 0.57 |
| p@chr10:46076251..46076291,- [rs7086046]                       |                                                                                                                                                                                                         | 0.19                         | 0.57 |
| p@chr9:15298766..15298791,+ [rs675849]                         |                                                                                                                                                                                                         | 0.18                         | 0.57 |
| p2@CU690121 [rs12225230]                                       |                                                                                                                                                                                                         | 0.18                         | 0.57 |
| p1@ENST00000438127 [rs3181]                                    |                                                                                                                                                                                                         | 0.18                         | 0.57 |
|                                                                | rs3181:rs10892074 D'=1.0; r <sup>2</sup> =0.17.<br>p@chr11:116980715..116980720,- [rs10892074]<br>rs3181:rs7930264 D'=1.0; r <sup>2</sup> =0.89.<br>enhancer@chr11:116870646-116870996 [rs7930264]      | 0.14                         | 0.64 |
| enhancer@chr6:34663389-34663600 [rs3800457, rs3800458]         |                                                                                                                                                                                                         | 0.07                         | 0.83 |
|                                                                |                                                                                                                                                                                                         | 0.17                         | 0.57 |

|                                                      |                                                                                                                                                                                                                                                                                                                                                                                                                                                                       |      |      |
|------------------------------------------------------|-----------------------------------------------------------------------------------------------------------------------------------------------------------------------------------------------------------------------------------------------------------------------------------------------------------------------------------------------------------------------------------------------------------------------------------------------------------------------|------|------|
|                                                      | rs3800457:rs11757370 D'=1.0; r <sup>2</sup> =0.3.<br>enhancer@chr6:34760607-34760986 [rs11757370,<br>rs11755420];rs3800457:rs11755420 D'=1.0; r <sup>2</sup> =0.3.<br>enhancer@chr6:34760607-34760986 [rs11757370,<br>rs11755420];rs3800458:rs11757370 D'=1.0; r <sup>2</sup> =0.89.<br>enhancer@chr6:34760607-34760986 [rs11757370,<br>rs11755420];rs3800458:rs11755420 D'=1.0; r <sup>2</sup> =0.89.<br>enhancer@chr6:34760607-34760986 [rs11757370,<br>rs11755420] | 0.15 | 0.62 |
|                                                      | rs3800457:rs2764205 D'=1.0; r <sup>2</sup> =0.96.<br>p1@ENST00000408001 [rs2764205];rs3800458:rs2764205<br>D'=1.0; r <sup>2</sup> =0.28. p1@ENST00000408001 [rs2764205]                                                                                                                                                                                                                                                                                               | 0.07 | 0.83 |
| p5@BAZ1B [rs1178979]                                 |                                                                                                                                                                                                                                                                                                                                                                                                                                                                       | 0.17 | 0.57 |
| p@chr8:126447258..126447275,+ [rs2385114]            |                                                                                                                                                                                                                                                                                                                                                                                                                                                                       | 0.17 | 0.57 |
| p@chr1:93627656..93627659,- [rs4847235]              |                                                                                                                                                                                                                                                                                                                                                                                                                                                                       | 0.17 | 0.57 |
| enhancer@chr10:65274637-65275000 [rs10761779]        |                                                                                                                                                                                                                                                                                                                                                                                                                                                                       | 0.16 | 0.59 |
| p2@APOM [rs3117583]                                  |                                                                                                                                                                                                                                                                                                                                                                                                                                                                       | 0.16 | 0.59 |
|                                                      | rs3117583:rs3130618 D'=1.0; r <sup>2</sup> =1.0. p6@GPANK1<br>[rs3130618]                                                                                                                                                                                                                                                                                                                                                                                             | 0.13 | 0.68 |
|                                                      | rs3117583:rs3115663 D'=1.0; r <sup>2</sup> =1.0. p5@PRRC2A<br>[rs3115663]                                                                                                                                                                                                                                                                                                                                                                                             | 0.02 | 0.95 |
| p@chr20:33356385..33356390,- [rs2295353]             |                                                                                                                                                                                                                                                                                                                                                                                                                                                                       | 0.15 | 0.62 |
| p@chr11:117075245..117075293,- [rs508487]            |                                                                                                                                                                                                                                                                                                                                                                                                                                                                       | 0.14 | 0.66 |
| p@chr11:46934513..46934519,+ [rs79920646, rs7120113] |                                                                                                                                                                                                                                                                                                                                                                                                                                                                       | 0.13 | 0.68 |
| p@chr6:139843931..139843972,+ [rs4896469]            |                                                                                                                                                                                                                                                                                                                                                                                                                                                                       | 0.13 | 0.7  |
| p4@TMEM110 [rs11720228]                              |                                                                                                                                                                                                                                                                                                                                                                                                                                                                       | 0.12 | 0.72 |
| enhancer@chr15:58712788-58712944 [rs11854624]        |                                                                                                                                                                                                                                                                                                                                                                                                                                                                       | 0.1  | 0.76 |
|                                                      | rs11854624:rs17821310 D'=1.0; r <sup>2</sup> =0.86. p1@LIPC<br>[rs17821310]                                                                                                                                                                                                                                                                                                                                                                                           | 0.1  | 0.77 |
| p@chr10:65121474..65121480,- [rs12355784]            |                                                                                                                                                                                                                                                                                                                                                                                                                                                                       | 0.09 | 0.78 |
| enhancer@chr12:123387713-123388070 [rs10847980]      |                                                                                                                                                                                                                                                                                                                                                                                                                                                                       | 0.08 | 0.79 |
| p6@PSORS1C1 [rs1265099]                              |                                                                                                                                                                                                                                                                                                                                                                                                                                                                       | 0.08 | 0.81 |
|                                                      | same SNP, different promoter:<br>chr6:31105474..31105493,+ [rs1265099]                                                                                                                                                                                                                                                                                                                                                                                                | 0.01 | 0.98 |
| enhancer@chr6:127481688-127482073 [rs9491700]        |                                                                                                                                                                                                                                                                                                                                                                                                                                                                       | 0.06 | 0.84 |
| enhancer@chr2:227172292-227172683 [rs2713556]        |                                                                                                                                                                                                                                                                                                                                                                                                                                                                       | 0.06 | 0.84 |
| p7@RBM6 [rs6772095]                                  |                                                                                                                                                                                                                                                                                                                                                                                                                                                                       | 0.05 | 0.86 |
| enhancer@chr1:39736190-39736575 [rs4660603]          |                                                                                                                                                                                                                                                                                                                                                                                                                                                                       | 0.05 | 0.86 |
| p5@NOL3 [rs2233455]                                  |                                                                                                                                                                                                                                                                                                                                                                                                                                                                       | 0.03 | 0.93 |
| p@chr17:37405559..37405561,- [rs2061342]             |                                                                                                                                                                                                                                                                                                                                                                                                                                                                       | 0.03 | 0.93 |
| p@chr16:19871741..19871755,- [rs11865578]            |                                                                                                                                                                                                                                                                                                                                                                                                                                                                       | 0.03 | 0.93 |
| p3@PACSINI [rs11758326]                              |                                                                                                                                                                                                                                                                                                                                                                                                                                                                       | 0.0  | 1.0  |

| Cell type                                                                       | RRA p   | FDR    |
|---------------------------------------------------------------------------------|---------|--------|
| Hepatocyte                                                                      | 4.3e-14 | 0      |
| liver adult pool1                                                               | 3.1e-10 | 0      |
| mesenchymalstemcells(adiposederived)adipogenicinduction day08                   | 0.00014 | 0      |
| mesenchymalstemcells(adiposederived)adipogenicinduction day14                   | 0.00018 | 0.0064 |
| Adipocyte differentiation day08                                                 | 0.0037  | 0.0064 |
| Adipocyte subcutaneous                                                          | 0.0062  | 0.0064 |
| liver fetal pool1                                                               | 0.0051  | 0.027  |
| mesenchymalstemcells(adiposederived)adipogenicinduction undifferentiatedcontrol | 0.028   | 0.042  |
| Adipocyte differentiation day12                                                 | 0.028   | 0.042  |
| macLPS 00hr00min                                                                | 0.023   | 0.042  |
| macLPS 22hr                                                                     | 0.045   | 0.049  |
